# Supplementary material for: Hierarchically porous Zn0.76Co0.24S/CoS heterostructures confined in N,S-co-doped carbon as high-performance anodes for sodium-ion batteries
Source: Royal Society of Chemistry journal article supplement (doi:10.1039/d4nj03543g), 2024-01-01
Supplement: d4nj03543g1.pdf [file d4nj03543g1.pdf]

**Hierarchically porous  $\text{Zn}_{0.76}\text{Co}_{0.24}\text{S}/\text{CoS}$  heterostructures confined in N, S-co-doped carbon as high-performance anodes for sodium-ion batteries**

Chao Li<sup>a,b,\*</sup>, Qing Li<sup>a,b</sup>, Yu Zhang<sup>a,b</sup>, Kangzhe Cao<sup>a,b,\*</sup>

<sup>a</sup>College of Chemistry and Chemical Engineering, Xinyang Normal University, Xinyang 464000, China

<sup>b</sup>Xinyang Key Laboratory of Low-Carbon Energy Materials, Xinyang Normal University, Xinyang 464000, China

\*Corresponding authors:

Email:lichao98.3.6@163.com; caokangzhe01@xynu.edu.cn

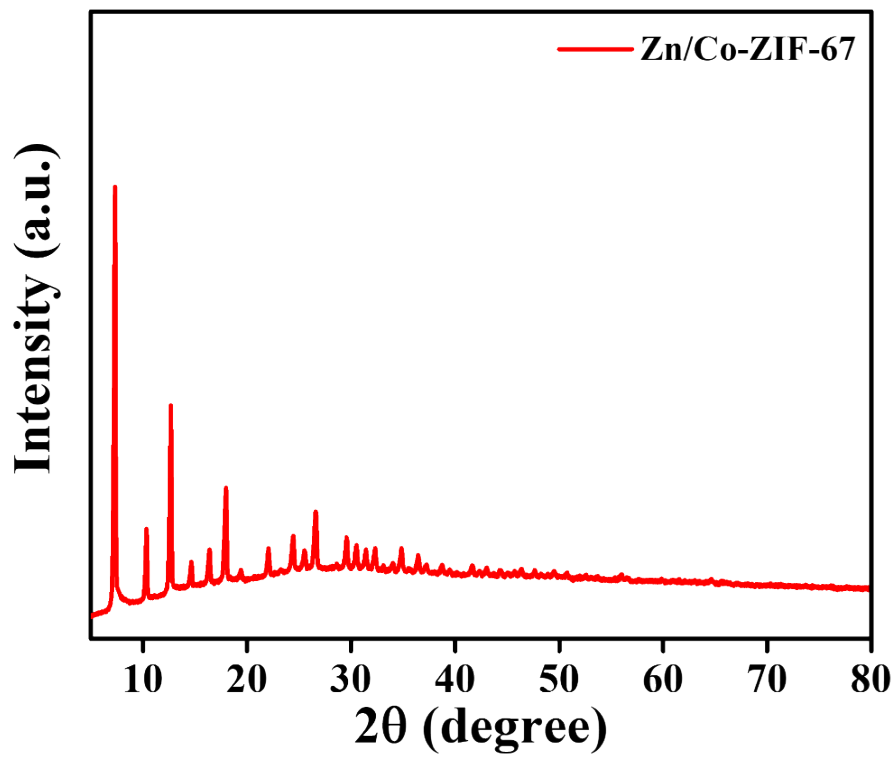

**Fig. S1** XRD pattern for Zn/Co-ZIF-67.

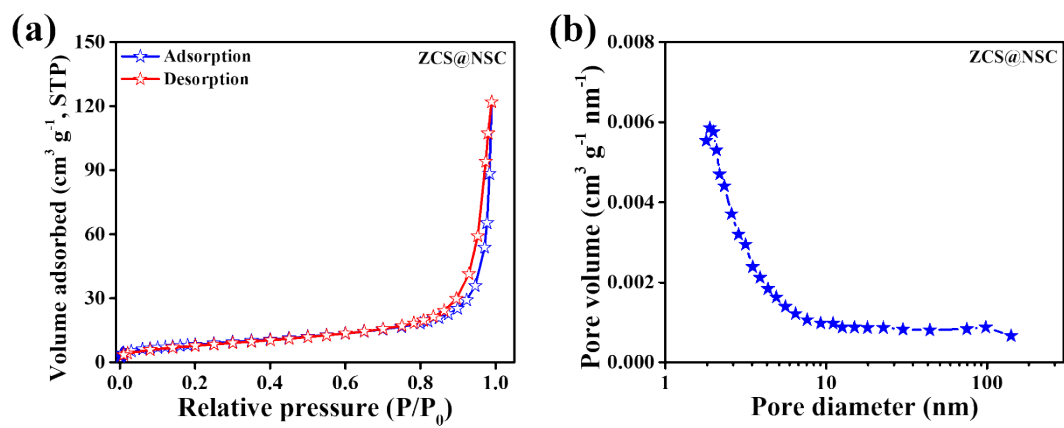

**Fig. S2** (a)  $N_2$  adsorption-desorption isotherms and (b) pore size distribution for ZCS@NSC.

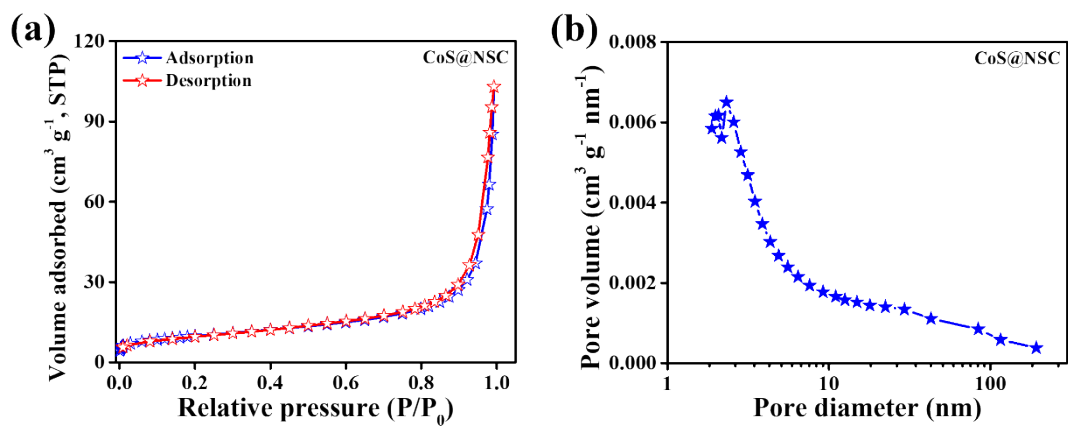

**Fig. S3** (a) N<sub>2</sub> adsorption-desorption isotherms and (b) pore size distribution for CoS@NSC.

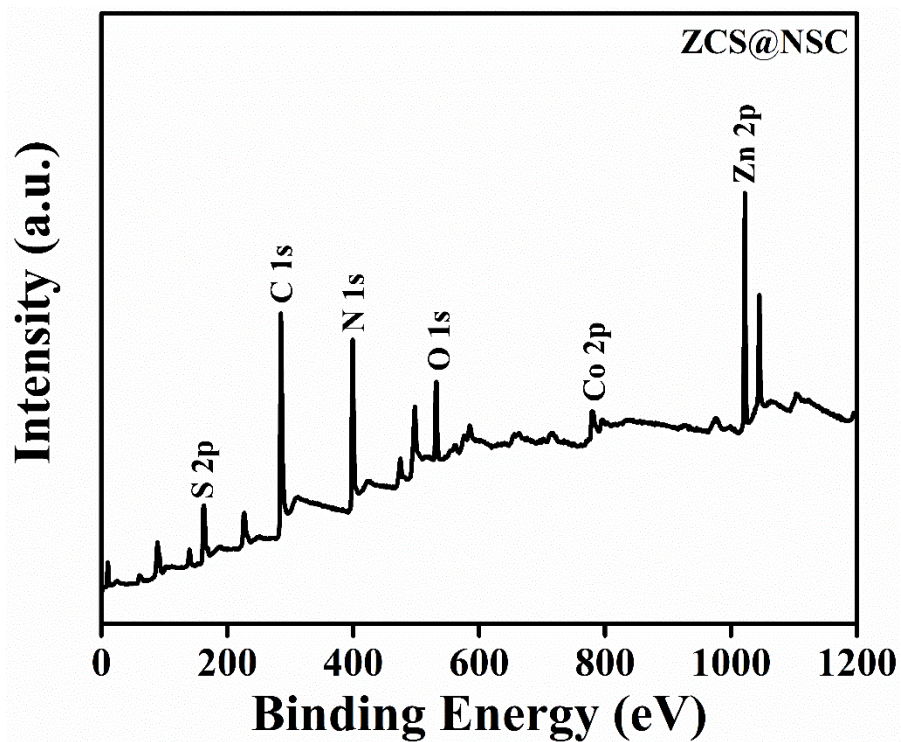

Fig. S4 The survey spectrum for ZCS@NSC.

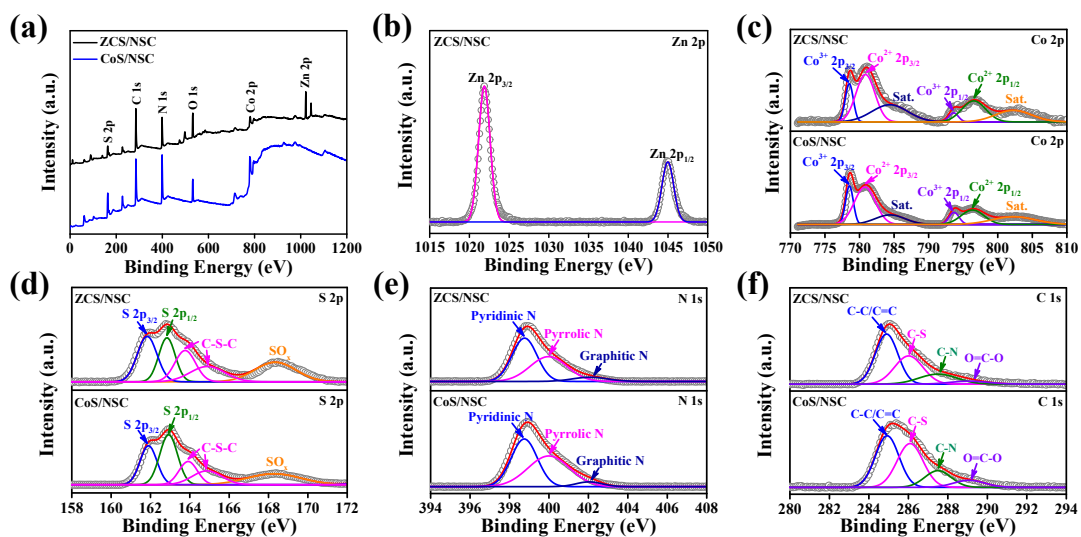

**Fig. S5** (a) The survey spectrum for ZCS/NSC and CoS/NSC; High-magnification XPS spectra of (b) Zn 2p, (c) Co 2p, (d) S 2p, (e) N 1s, and (f) C 1s.

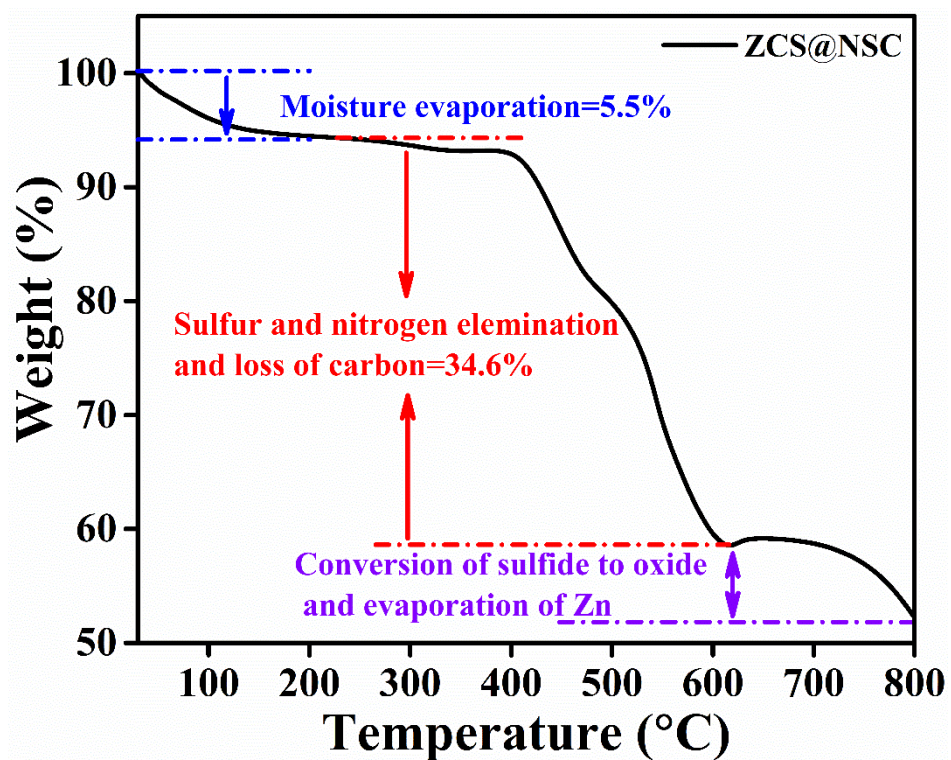

Fig. S6 TGA curve for ZCS@NSC.

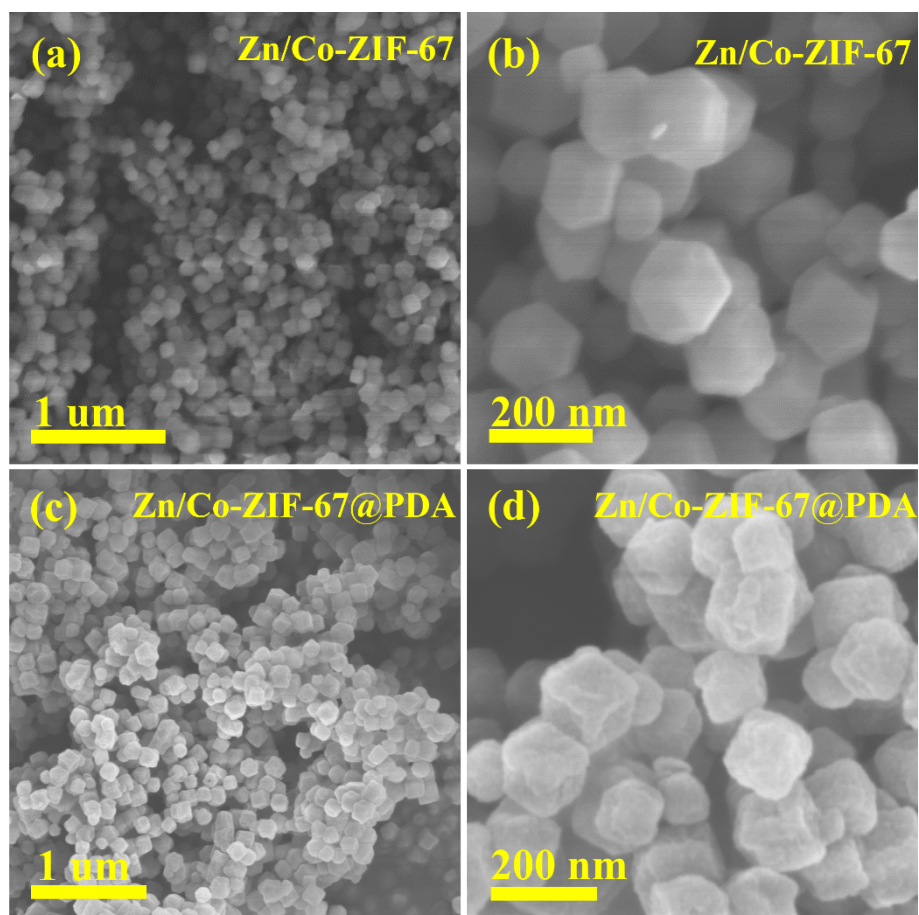

**Fig. S7** (a) low- and (b) high-resolution SEM images for Zn/Co-ZIF-67; (c) low- and (d) high-resolution SEM images for Zn/Co-ZIF-67@PDA.



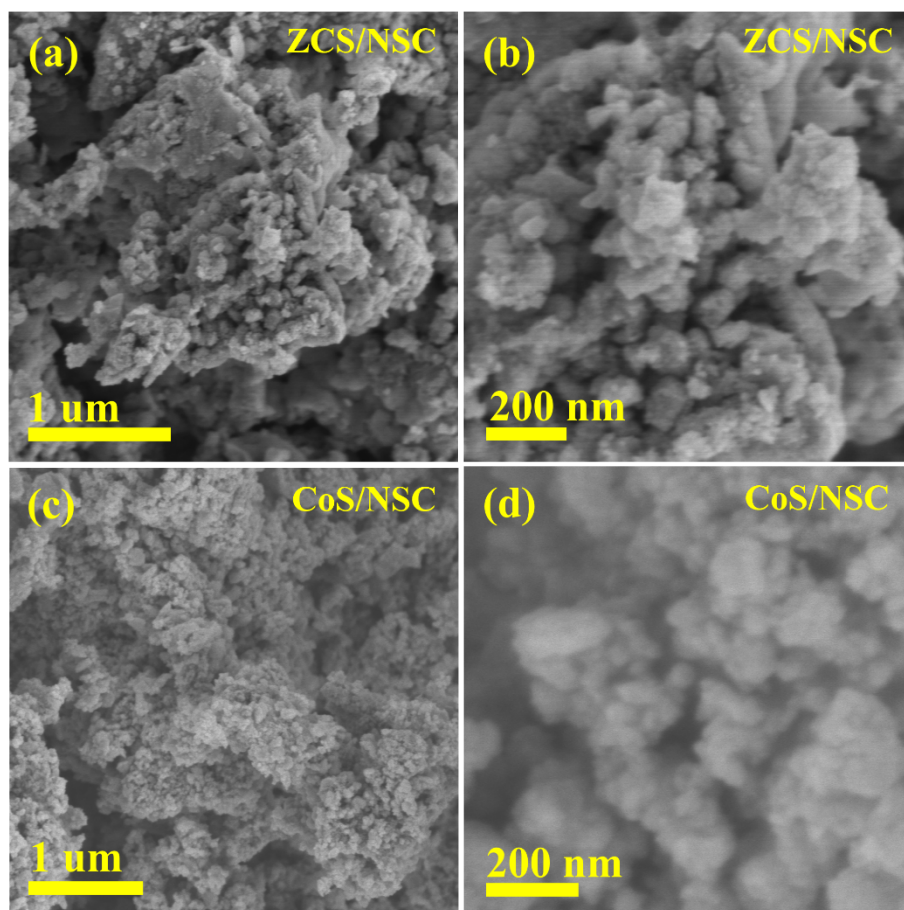

**Fig. S8** (a) low- and (b) high-resolution SEM images for ZCS/NSC; (c) low- and (d) high-resolution SEM images for CoS/NSC.

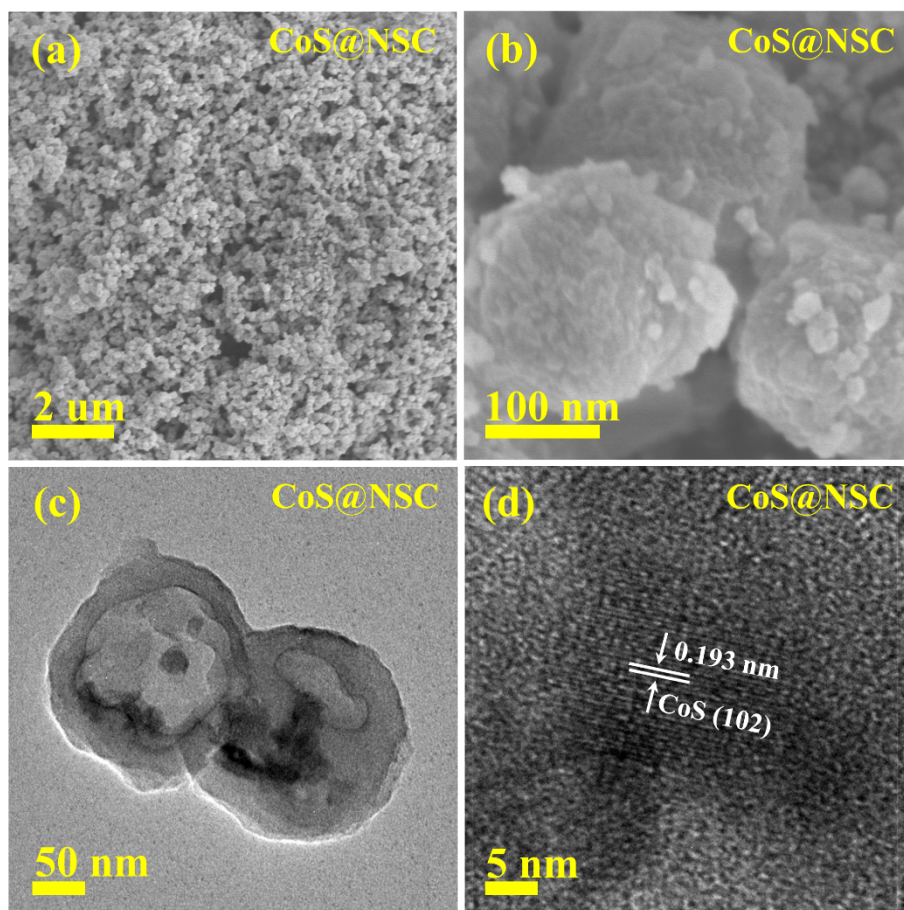

**Fig. S9** (a) Low- and (b) high-resolution SEM images for CoS@NSC; (c) TEM and (d) HRTEM images for CoS@NSC.

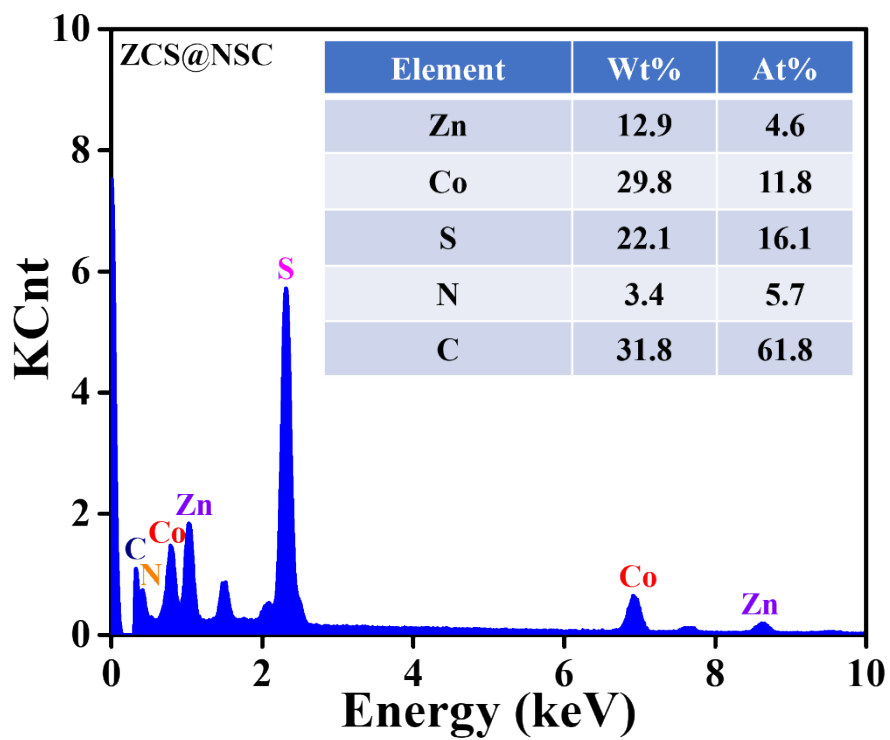

Fig. S10 EDS spectrum for ZCS@NSC.

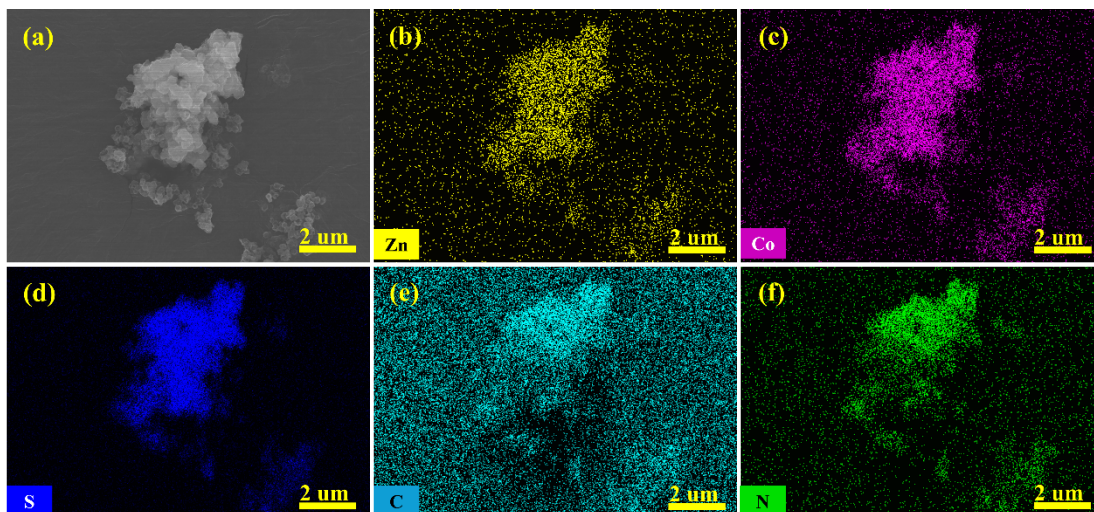

**Fig. S11** SEM-EDS mapping spectra for ZCS@NSC.

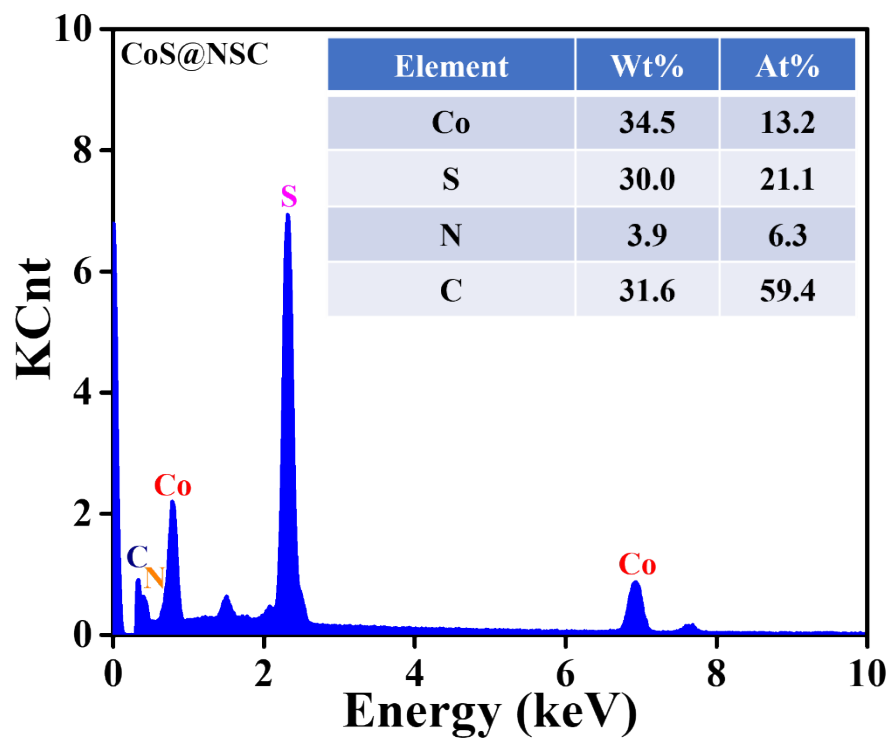

Fig. S12 EDS spectrum for CoS@NSC.

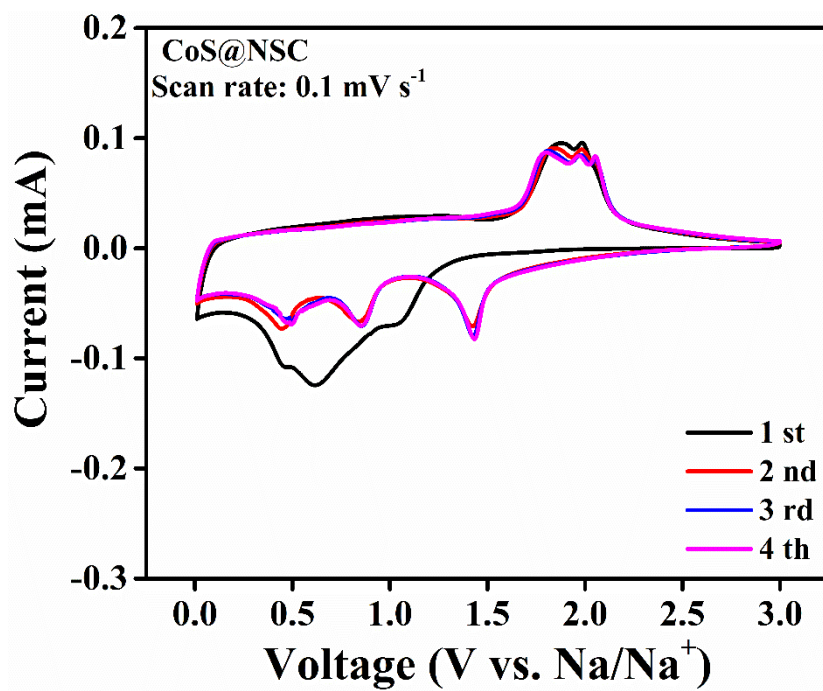

**Fig. S13** First four CV curves for CoS@NSC at 0.1 mV s<sup>-1</sup>.

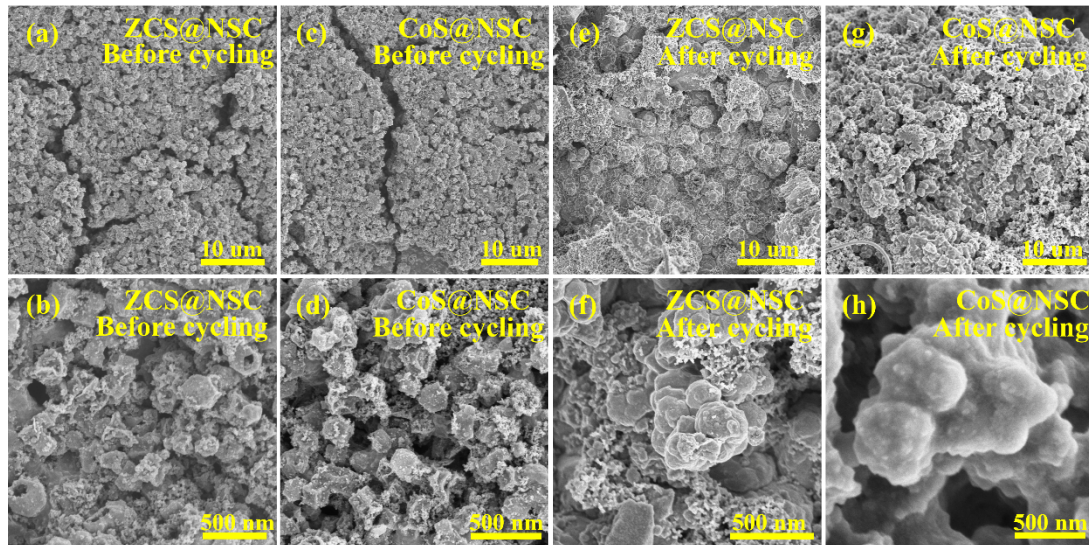

**Fig. S14** SEM images for the electrodes; (a-b) ZCS@NSC and (c-d) CoS@NSC before cycling test, (e-f) ZCS@NSC and (g-h) CoS@NSC after 300 GCD cycles.

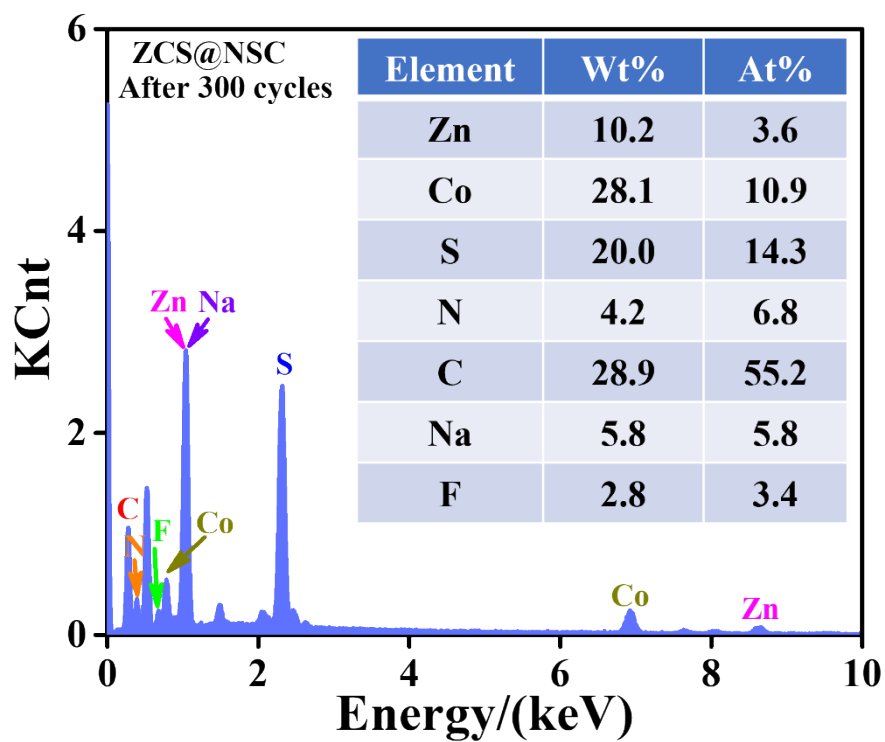

**Fig. S15** EDS spectrum for the ZCS@NSC after 300 GCD cycles.



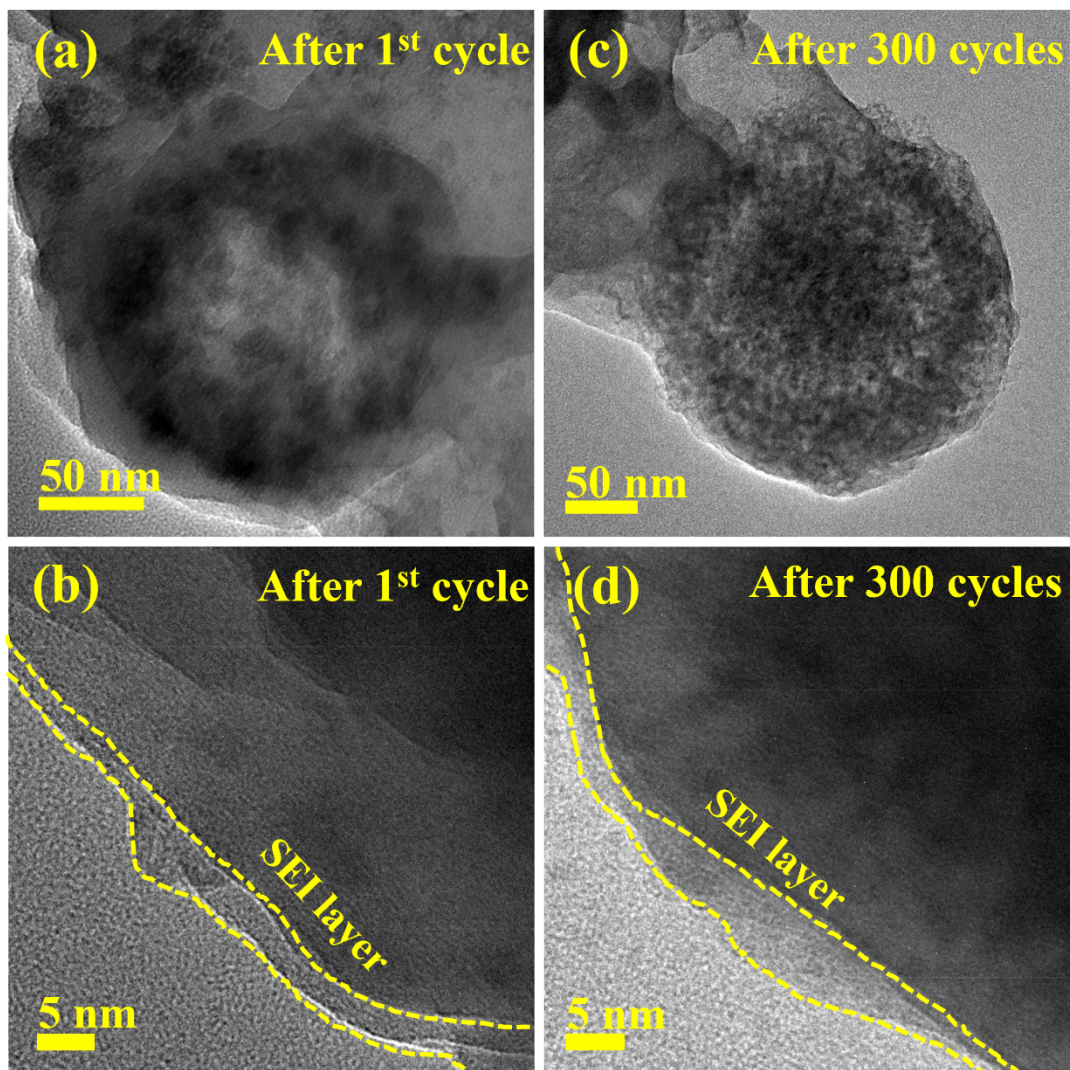

**Fig. S16** TEM and HRTEM images for ZCS@NSC, (a-b) after the first GCD cycle and (c-d) after 300 GCD cycles.

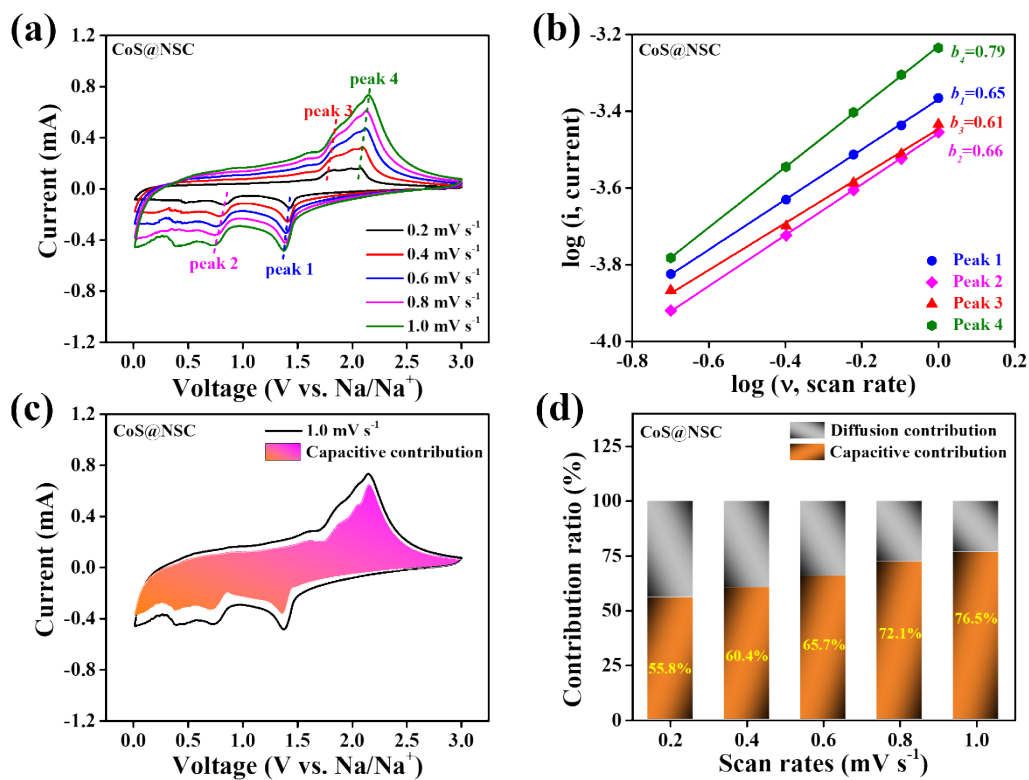

**Fig. S17** (a) CV plots from 0.2-1.0 mV s<sup>-1</sup>; (b)  $b$  values for the cathodic and anodic peaks; Capacitive contribution at (c) 1.0 mV s<sup>-1</sup> and (d) various scan rates for CoS@NSC.

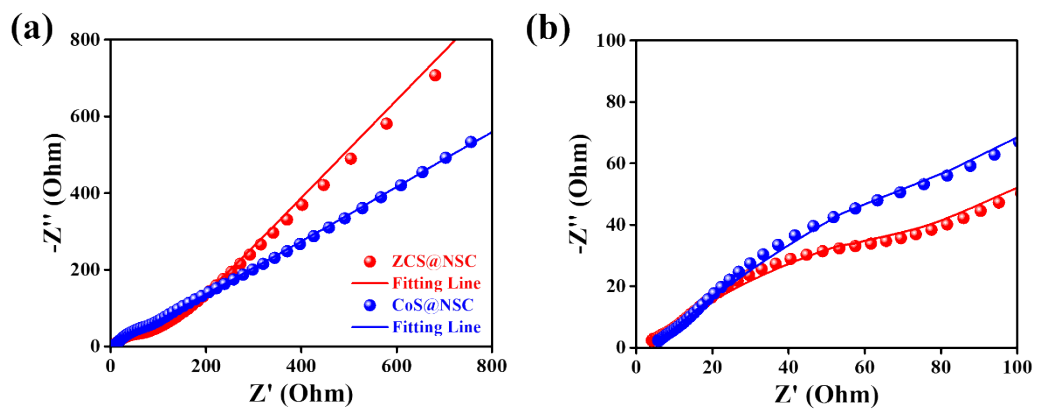

**Fig. S18** (a) Nyquist plots for the ZCS@NSC and CoS@NSC anodes after 300 GCD cycles; (b) The enlarged Nyquist plots in the high-frequency regions.

**Table S1** ICP-OES results for ZCS@NSC and CoS@NSC.

| <b>Samples</b> | <b>ZCS@NSC<br/>(at.%)</b> | <b>CoS@NSC<br/>(at.%)</b> |
|----------------|---------------------------|---------------------------|
| Zn             | 13.8                      |                           |
| Co             | 32.7                      | 40.8                      |
| S              | 53.5                      | 59.2                      |
| Total          | 100                       | 100                       |

**Table S2** Comparison of the Na<sup>+</sup>-storage performance of reported binary metal sulfides and the ZCS@NSC.

| Electrode materials                     | Specific capacity (mAh g <sup>-1</sup> ) | Rate capability (mAh g <sup>-1</sup> ) | Capacity retention (mAh g <sup>-1</sup> )           | Ref.      |
|-----------------------------------------|------------------------------------------|----------------------------------------|-----------------------------------------------------|-----------|
| ZnS/CoS <sub>2</sub> @NC@NC             | 401<br>(0.1 A g <sup>-1</sup> )          | 170<br>(5.0 A g <sup>-1</sup> )        | 239 after 500 cycles<br>(1.0 A g <sup>-1</sup> )    | [1]       |
| CuCo <sub>2</sub> S <sub>4</sub> /rGO   | 504<br>(0.05 A g <sup>-1</sup> )         | 336<br>(1.0 A g <sup>-1</sup> )        | -                                                   | [2]       |
| MnS/CoS@C                               | 526<br>(0.1 A g <sup>-1</sup> )          | 273.7<br>(10 A g <sup>-1</sup> )       | 214.8 after 1000 cycles<br>(5.0 A g <sup>-1</sup> ) | [3]       |
| NiS/MoS <sub>2</sub> /C                 | 516<br>(0.1 A g <sup>-1</sup> )          | 398<br>(5.0 A g <sup>-1</sup> )        | 335 after 200 cycles<br>(1.0 A g <sup>-1</sup> )    | [4]       |
| MoS <sub>2</sub> @NiS/rGO               | 289.5<br>(0.1 A g <sup>-1</sup> )        | 66.8<br>(5.0 A g <sup>-1</sup> )       | 131.3 after 800 cycles<br>(1.0 A g <sup>-1</sup> )  | [5]       |
| CoS <sub>2</sub> /NiS <sub>2</sub> -RGO | 475<br>(0.1 A g <sup>-1</sup> )          | 58.2<br>(5.0 A g <sup>-1</sup> )       | 127 after 200 cycles<br>(1.0 A g <sup>-1</sup> )    | [6]       |
| FeS/ZnS                                 | 538.5<br>(0.1 A g <sup>-1</sup> )        | 207.6<br>(2.0 A g <sup>-1</sup> )      | 475.1 after 50 cycles<br>(0.1 A g <sup>-1</sup> )   | [7]       |
| ZnS/CuS@C                               | 454.4<br>(0.1 A g <sup>-1</sup> )        | 298.9<br>(10.0 A g <sup>-1</sup> )     | 387.4 after 700 cycles<br>(2.0 A g <sup>-1</sup> )  | [8]       |
| ZnS/CoS@C/rGO                           | 484.2<br>(0.1 A g <sup>-1</sup> )        | 308.0<br>(2.0 A g <sup>-1</sup> )      | 374.2 after 500 cycles<br>(1.0 A g <sup>-1</sup> )  | [9]       |
| FeS/MoS <sub>2</sub>                    | 457<br>(0.1 A g <sup>-1</sup> )          | 325<br>(5.0 A g <sup>-1</sup> )        | 331 after 200 cycles<br>(2.0 A g <sup>-1</sup> )    | [10]      |
| ZCS@NSC                                 | 568.2<br>(0.1 A g <sup>-1</sup> )        | 224.1<br>(10.0 A g <sup>-1</sup> )     | 320.6 after 300 cycles<br>(1.0 A g <sup>-1</sup> )  | This work |

**Table S3** EIS fitting results for the ZCS@NSC and CoS@NSC anodes before and after cyclic stability tests.

| <b>Electrode materials</b> | <b><math>R_s</math> (<math>\Omega</math>)</b> | <b><math>R_{ct}</math> (<math>\Omega</math>)</b> |
|----------------------------|-----------------------------------------------|--------------------------------------------------|
| ZCS@NSC-before cycling     | 4.0                                           | 277.9                                            |
| ZCS@NSC-after cycling      | 3.8                                           | 170.5                                            |
| CoS@NSC-before cycling     | 6.9                                           | 401.9                                            |
| CoS@NSC-after cycling      | 6.5                                           | 273.2                                            |

## References

- 1 H. He, M. Li, Y. Gan, J. Mou, J. Yuan, X. Zhang, B. Li, J. Yu, C. Zhang, X. Li and J. Liu, *J. Alloys Compd.*, 2024, **979**, 173606.
- 2 Y. Gong, J. Zhao, H. Wang and J. Xu, *Electrochim. Acta*, 2018, **292**, 895-902.
- 3 Z. Jiang, S. Li, Y. Chen, J. Chen, C. Wei and Q. Xu, *Nanoscale*, 2023, **15**, 12296-12306.
- 4 H. Xie, M. Chen and L. Wu, *ACS Appl. Mater. Interfaces*, 2019, **11**, 41222-41228.
- 5 T. Han, Z. He, W. Kuang, J. Zhou and Y. Li, *Nano Energy*, 2024, **128**, 109953.
- 6 J. Liu, Y. G. Xu and L. B. Kong, *J. Mater. Sci. Mater. Electron.*, 2020, **31**, 9946-9959.
- 7 D. Xie, S. Cai, X. Sun, T. Hou, K. Shen, R. Ling, A. Fan, R. Zhang, S. Jiang and Y. Lin, *Inorg. Chem. Commun.*, 2020, **111**, 107635.
- 8 W. Zhao, L. Gao, L. Yue, X. Wang, Q. Liu, Y. Luo, T. Li, X. Shi, A. M. Asiri and X. Sun, *J. Mater. Chem. A*, 2021, **9**, 6402-6412.
- 9 M. Jia, W. Chen, Y. He, Y. Liu and M. Jia, *Molecules*, 2023, **28**, 6914.
- 10 L. Fu, W. Xiong, Q. Liu, S. Wan, C. Kang, G. Li, J. Chu, Y. Chen and S. Yuan, *J. Alloys Compd.*, 2021, **869**, 159348.
